# Supplementary material for: Structural and functional diversification in the teleost S100 family of calcium-binding proteins
Source: PubMed Central journal article supplement (PMC2266712; doi:10.1186/1471-2148-8-48), 2008-02-14
Supplement: 1471-2148-8-48-S3.pdf [file 1471-2148-8-48-S3.pdf]

**Mean evolutionary distance between ortholog and paralog amino acid sequence groups**

|                     | Orthologs |      |      |      |      |      |      |      |      |      |      |      |      |      |      | Paralogs |      |      |      |      |      |
|---------------------|-----------|------|------|------|------|------|------|------|------|------|------|------|------|------|------|----------|------|------|------|------|------|
|                     | A1        | A10  | A11  | B    | I    | P    | Q    | R    | S    | T    | U    | V    | W    | Z    | Avr. | Dr       | OI   | Ga   | Tn   | Tr   | Avr. |
| Mean Evol. Distance | 0,34      | 0,44 | 0,37 | 0,41 | 0,47 | 0,25 | 0,82 | 0,69 | 0,15 | 0,13 | 0,56 | 0,79 | 0,56 | 0,11 | 0,44 | 1,04     | 1,07 | 0,97 | 1,12 | 1,18 | 1,08 |
