# Supplementary material for: Structural and functional diversification in the teleost S100 family of calcium-binding proteins
Source: PubMed Central journal article supplement (PMC2266712; doi:10.1186/1471-2148-8-48), 2008-02-14
Supplement: 1471-2148-8-48-S4.pdf [file 1471-2148-8-48-S4.pdf]

S100 Sequence Alignment

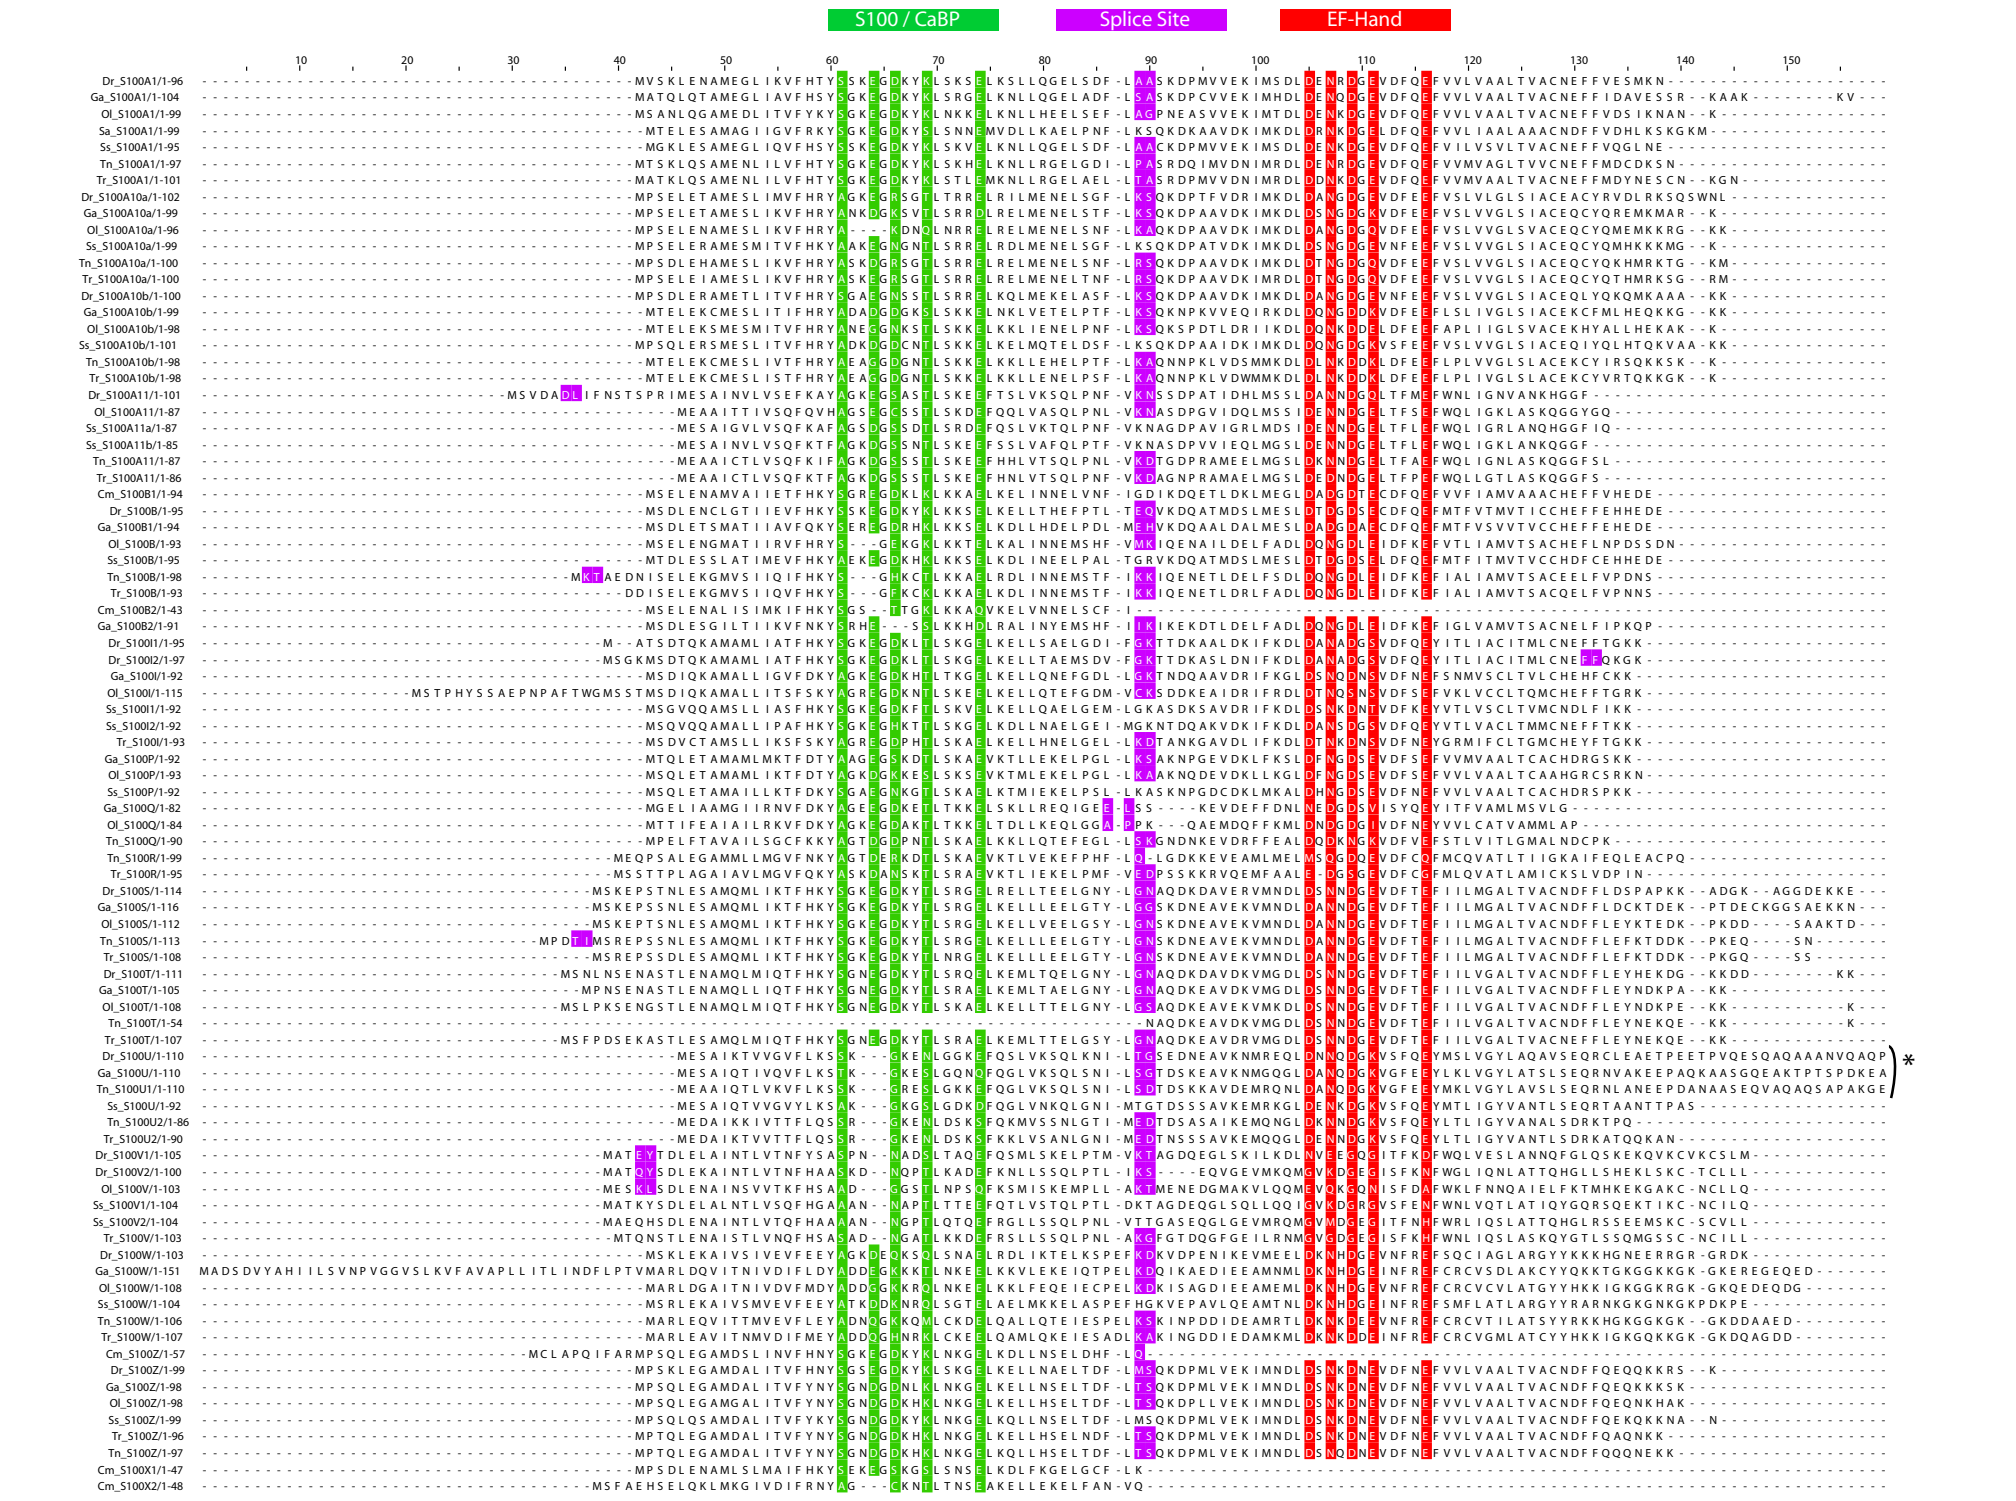

\*

Splice information for salmon and shark is not available

\* Sequences cut for clarity
