# Supplementary material for: Structural and functional diversification in the teleost S100 family of calcium-binding proteins
Source: PubMed Central journal article supplement (PMC2266712; doi:10.1186/1471-2148-8-48), 2008-02-14
Supplement: 1471-2148-8-48-S5.pdf [file 1471-2148-8-48-S5.pdf]

Number of positive and negative selected sites resulting from the site-by-site dN/dS analysis

|         | p<0.1          |                | p<0.2          |                |
|---------|----------------|----------------|----------------|----------------|
|         | Positive Sites | Negative Sites | Positive Sites | Negative Sites |
| A1      | 0              | 14             | 0              | 39             |
| A10     | 0              | 43             | 0              | 54             |
| A11     | 0              | 8              | 0              | 23             |
| B       | 0              | 13             | 0              | 30             |
| I       | 0              | 11             | 0              | 24             |
| P       | n.d.           | n.d.           | n.d.           | n.d.           |
| Q       | 0              | 6              | 0              | 13             |
| R       | n.d.           | n.d.           | n.d.           | n.d.           |
| S       | 0              | 15             | 0              | 28             |
| T       | 0              | 19             | 0              | 45             |
| U       | 0              | 10             | 0              | 23             |
| V       | 0              | 10             | 0              | 26             |
| W       | 0              | 19             | 0              | 34             |
| Z       | 0              | 17             | 0              | 34             |
| Average | 0,0            | 15,4           | 0,0            | 31,1           |
