# Supplementary material for: Structural and functional diversification in the teleost S100 family of calcium-binding proteins
Source: PubMed Central journal article supplement (PMC2266712; doi:10.1186/1471-2148-8-48), 2008-02-14
Supplement: 1471-2148-8-48-S6.pdf [file 1471-2148-8-48-S6.pdf]

---

## S100A1

CTTCAAGGGGAACCTCAGTGACTTTTTAGC

CGCAAGTAAAGACCCCATGGTGGTGGAGAAGATCATGTCTGATCTGGATG  
AGAACC GGGATGGAGAGGTGGACTTTCAGGAGTTTGTGTGCTGGTGGCT  
GCTCTACTGTGGCATGCAATGAGTTTTAATCTGAATTCGTGACAAGCT

## S100A10b

TCGCAGGACATTCACATCATTCCTTCATCTT

CAGGTGACGCTCTGCCTTTATCAGCACATTCACAATGCCATCTGATCTGG  
AGAGAGCAATGGAGACCCTGATCACGGTGTTCACCGTTATTCAGGCGCA  
GAGGGGAACCTCATCAACCCTGAGTCGAAGAGAGCTTAAACAGCTGATGGA  
GAAAGAGCTGGCTAGTTTTCTGAAGAGTCAGAAAGACCCTGCTGCCGTAG  
ACAAGATTATGAAGGATCTGGATGCCAATGGGGATGGAGAGGTGAATTTT  
GAGGAGTTTGTGTCTCTTGTGGTGGGCCTGTCCATCGCCTGCGAACAAC  
CTACCAGAAACAGATGAAAGCAGCAGCCAAGAAGTAATAAAAGACCAAAC  
ATGAGGGGAAAAATCTGAATTCGTGACAAGCTTCTCGAGCCTAGGCTAG

## S100A10a

TA

TTTCACTCAGTCGCCCAAACGTGCTTGACCTGAGCATCGCGCAGCCATGC  
CATCCGAACTAGAGACCGCCATGGAGTCCCTCATCATGGTTTTCCACCGA  
TATGCTGGAAAGGAGGGCAGGAGCGGCACCCTGACCCGACGGGAACTCCG  
AATACTAATGGAGAACGAGCTCTCTGGGTTCCCTTAAGTCTCAGAAGGATC  
CGACATTCGTCGACAGAATTATGAAAGATCTGGATGCCAATGGAGACGGC  
GAGGTTGACTTTGAGGAGTTTGTGTCTTTGGTCTTGGGTTTGTCCATAAT

## S100A11

TCANCCCTTATGCTGGGAAGGAAGGTTTCAGCAAGTACTCTGA

GTAAAGAAGAGTTTACAAGCTTGGTCAAATCCCAGTTACCAAACCTTTGTA  
AAGAAATTCATCTGATCCAGCCACCATTGACCATCTCATGAGCTCATTGGA  
TGCGAATAATGATGGGCAGCTGACGTTTCATGGAGTTCTGGAATCTGATTG  
GCAATGTTGCA

## S100B

TGAAAGTTTGGACA

CCGATGGCGACTCGGAGTGTGATTTCCAGGAGTTCATGACCTTCGTCACC  
ATGGTTACCATCTGTTGCCATGAGTTTTTTCGAACACCATGAAGACGAATG  
AGTCTAAATAAAAAGAAAGTAGTTTTTCGTAGTTTAAATGAGTCTCAATACAT  
TTCTTCAGTAAACTTTACTTCGTTCTCATCGCATTAGGATTGTTTTATTG  
TTGTTGTTTGTGTTGGACAGAATGTACATGCAGCTTGTCTGACAATTTAGC  
TTATTTCTGCTAGACTCGAAAATCAGTTCGTAATTTATTACAAAGCATGC  
TTCTATTATTTTGGCTAGACATTTGTTTCAAGACATGGCCA

## S100I1

TCA

NGGCTACCTTCCACAAATACTCTGGAAAGGAGGGCGACAAATTGACCCTG  
TCCAAAGGCGAGCTGAAGGAAGTCTCTCTGCAGAGTTGGGCGACATCTT  
TGGGAAAACCTACAGACAAGGCAGCTTTGGACAAGATATTCAAGGATCTGG  
ATGCAAATGCTGATGGTTCTGTGGACTTTCAGGAGTACATCACATTGATC  
GCCTGT

## S100S

TGCCCTTTTTTCATCAAGACCTTTCATAAGTACTTGGGGAAGGAAGGAGAC  
AAGTATACGCTCAGCCGAGGAGAAGTCTGAGGGAAGTCTGACAGAGGAGCT  
GGGGAATTATCTTGGGAACGCTCAAGATAAAGACGCGGTGGAGCGAGTGA  
TGAACGATCTGGACTCCAATAACGACGGCGAGGTGGATTTACCCGAGTTC  
ATCATCCTCATGGGCGCTCTGACCGTGGCCTGCAACGACTTCTTCCTGGA  
C

## S100T

TGGGAATGAGGGTGACAAATATACTCTCAGCAGACAGGAACTCAAAGAGA  
TGTTAACGCAGGAGCTGGGAAACTACCTTGGGGTGAAGAGAGATTTAAAA  
AAAAAAGAGTTTGCTTAGAGAAAAGTATAAGATTCTGATTAAGTTCATCTG  
TATCTCCCTTACTCCACAGAATGCACAGGATAAGGATGCGGTAGATAAAG  
TTATGGGAGATCTAGATTCAAACAACGATGGTGGAGGTGGACTTCACAGAG  
TTCATCATCCTCGTAGGTGCCCTCACCGTCGCCTGCAACGACTTCTTCCT  
CGAGTATCATGAAAAGGATGGAAAGAAGGATGACAAGAAATAGAGACGCA  
TTTGTCTAAAGCCAACACATGACCAGCGAATGA

## S100Z

TAAACTGG

GGGAGCAATGGATGCGCTGATCACCGTCTTCCACAAGTACTCCGGCAGT  
ZGAAGGAGACAAATACAAACTGAGCAAAGGAGAGCTGAAGGAGCTTCTCAA  
CGCTGAACTCACCGACTTCTCATGTCTCAGAAGGACCCGATGCTGGTGG  
AGAAGATCATGAACGATCTGGACTCCAACAAGGACAACGAGGTGGACTTT  
AATGAGTTTGTGGTTCTGGTGGCGGCGCTGACTGTGGCCTGTAACGACTT  
CTTCCAGGAACAACAGAAGAAAAGGAGCAAATAGAACACATTGTATACCC  
GTAGTGCTCTATGACGCATTAACCATCACAGCAGTCTCCTGTTACTCC  
ACATTCATCTACATCTTTGTATTTAAAATATTTAAAATGACAGTTTTTCTC  
ACATTAATGTATTTATCGTAAACTGAGTGCTGGA
